# Supplementary material
Source: PubMed Central journal article supplement (PMC10038131)
Supplement: NIHMS1875493-supplement-Supplementary_Material.pdf [file NIHMS1875493-supplement-Supplementary_Material.pdf]

## **SUPPORTING INFORMATION**

### **Dual Function Antibody Conjugates for Multimodal Imaging and Photoimmunotherapy of Cancer Cells**

Mohammad A. Saad<sup>1</sup>, Marvin Xavierselvan<sup>2</sup>, Hamza A. Sharif<sup>3</sup>, Scott Selfridge<sup>4</sup>, Robert Pawle<sup>4</sup>, Mark Varvares<sup>5</sup>, Srivalleesha Mallidi<sup>1,2</sup>, and Tayyaba Hasan<sup>1,6\*</sup>

<sup>1</sup> Wellman Center for Photomedicine, Massachusetts General Hospital and Harvard Medical School, Boston, MA 02114, USA

<sup>2</sup> Department of Biomedical Engineering, Science and Technology Center, Tufts University, Medford, MA 02155, USA

<sup>3</sup> Albany Medical College, Albany, New York 12208, USA

<sup>4</sup> Akita Innovations, North Billerica, MA 01862, USA

<sup>5</sup> Department of Otolaryngology Head and Neck Surgery, Harvard Medical School, The Massachusetts Eye and Ear, 243 Charles St, Boston, MA 02114, USA

<sup>6</sup> Division of Health Sciences and Technology, Harvard University and Massachusetts Institute of Technology, Cambridge, MA 02139, USA

\* Corresponding author email: [thasan@mgh.harvard.edu](mailto:thasan@mgh.harvard.edu) (Tayyaba Hasan)

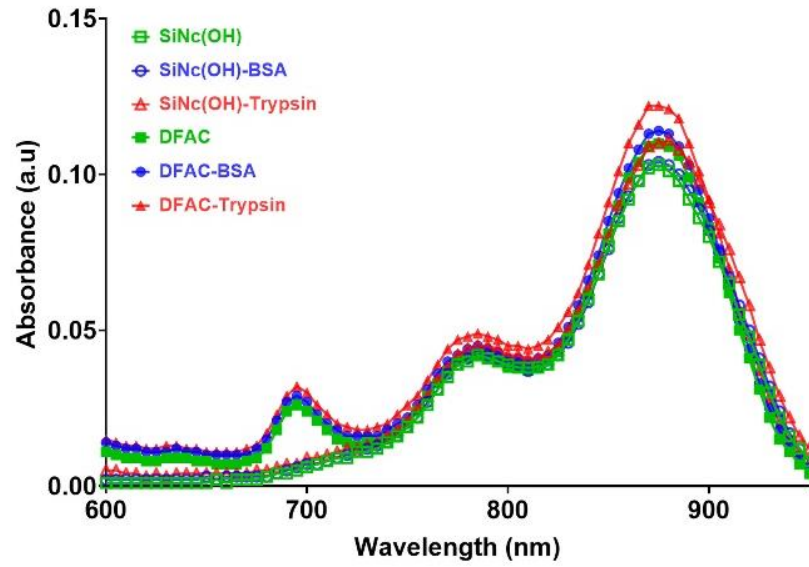

**Figure S1.** Comparison of absorption spectra of SiNc(OH) and DFAC, at 1  $\mu$ M (SiNc(OH) equivalent), performed in solutions containing 0.1% BSA (blue curves) and 0.1% Trypsin (red curves). The absorption spectra of SiNc(OH) and DFAC were not affected by the presence of BSA and Trypsin.

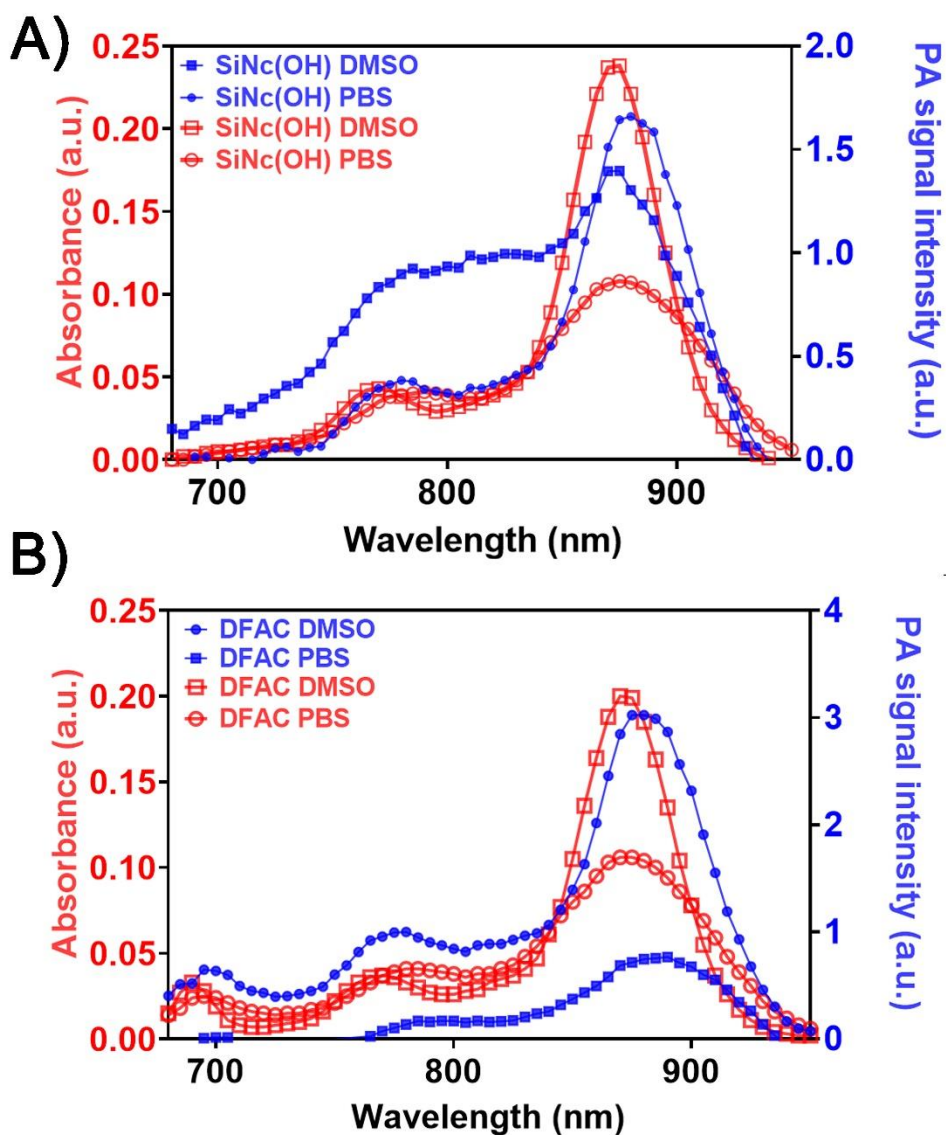

**Figure S2.** (A) Comparison of UV-Vis (red) and Photoacoustic (blue) spectra of SiNc(OH) dye in PBS (circles) and DMSO (squares). (B) Comparison of UV-Vis (red) and Photoacoustic (blue) spectra of DFAC in PBS (circles) and DMSO (squares). The absorption of SiNc(OH) dye at the  $\lambda_{\text{max}}$  (865 nm) is higher in DMSO as compared to that in PBS. The PA spectra for DFAC showed a significantly enhanced intensity at  $\lambda_{\text{max}}$  (865 nm) in DMSO.

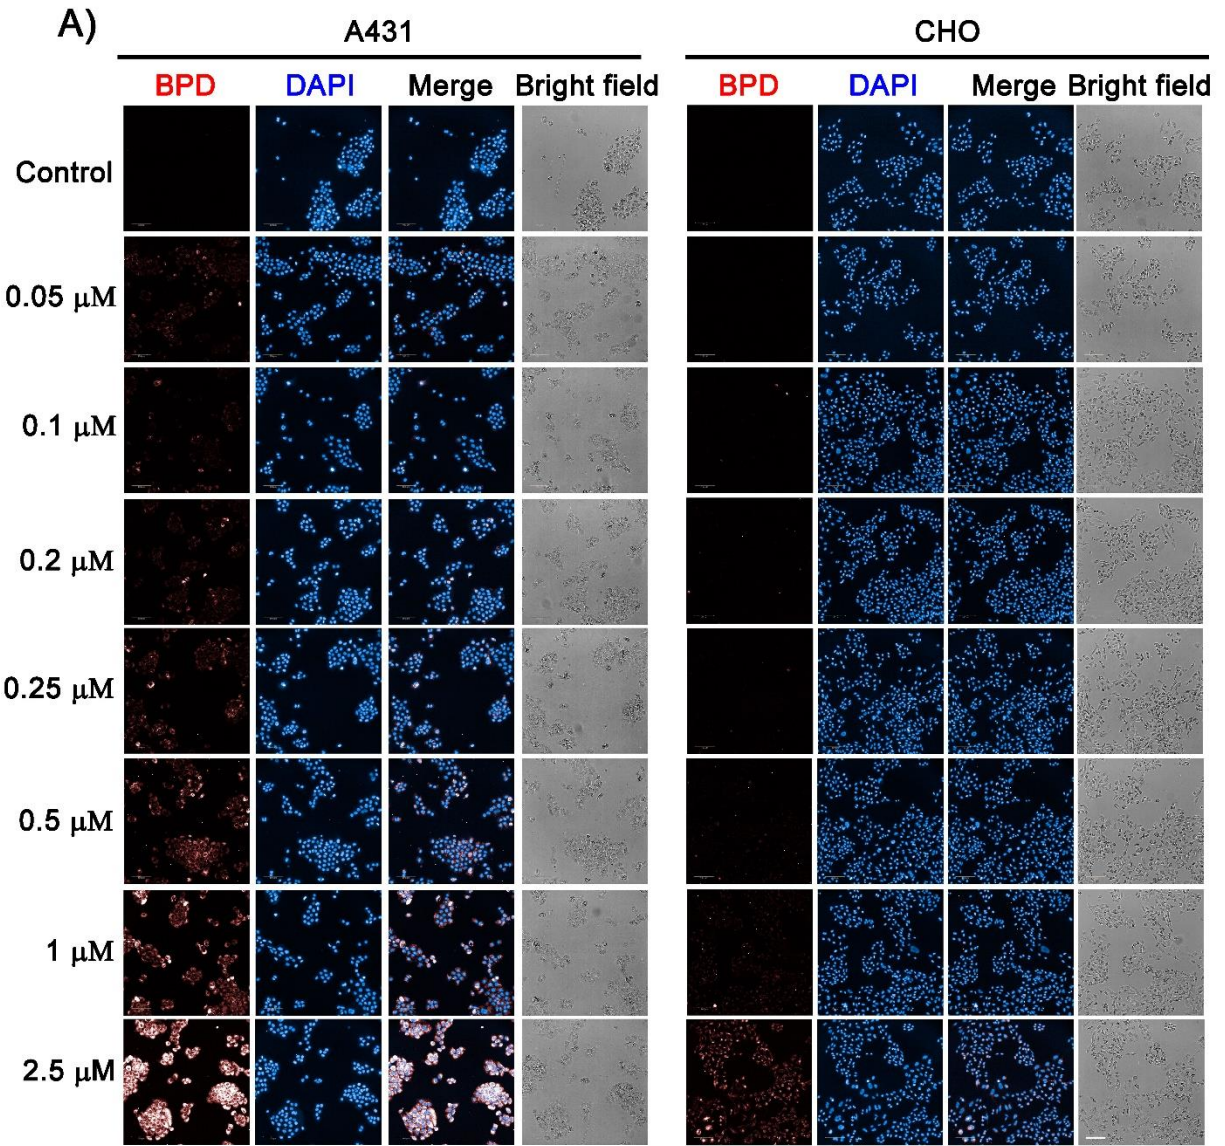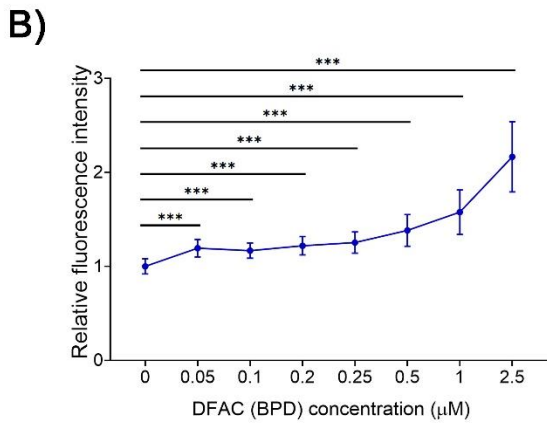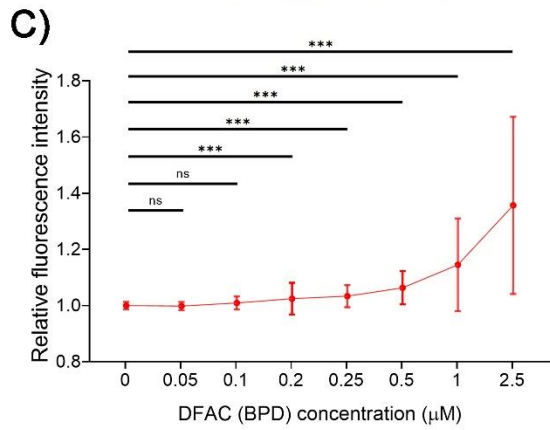



**Figure S3.** (A) Fluorescence images of A431 and CHO cells incubated with increasing concentrations (BPD equivalent) of DFAC for 24 h. Cells were washed with PBS, stained with Hoechst nuclear stain and imaged using an Operetta high content imaging system (Scale bar = 100  $\mu\text{m}$ ). (B and C) Quantification of the fluorescence images indicate significantly increased fluorescence intensity in A431 cells incubated with 0.05  $\mu\text{M}$  of DFAC (BPD equivalent). A significantly increased fluorescence signal was observed for CHO cells incubated with 0.2  $\mu\text{M}$  (BPD equivalent) DFAC. Data are presented as mean  $\pm$  S.D ( $n \geq 600$  cells across 5 different imaging fields), analyzed using one-way ANOVA with Tukey's test for post-hoc analysis. P-values  $< 0.05$  were considered to be significant and are indicated by asterisks as follows: <sup>ns</sup>P $>0.05$ , \*P $<0.05$ , \*\*P $<0.01$ , \*\*\*P $<0.001$  and \*\*\*\*P $<0.0001$ .

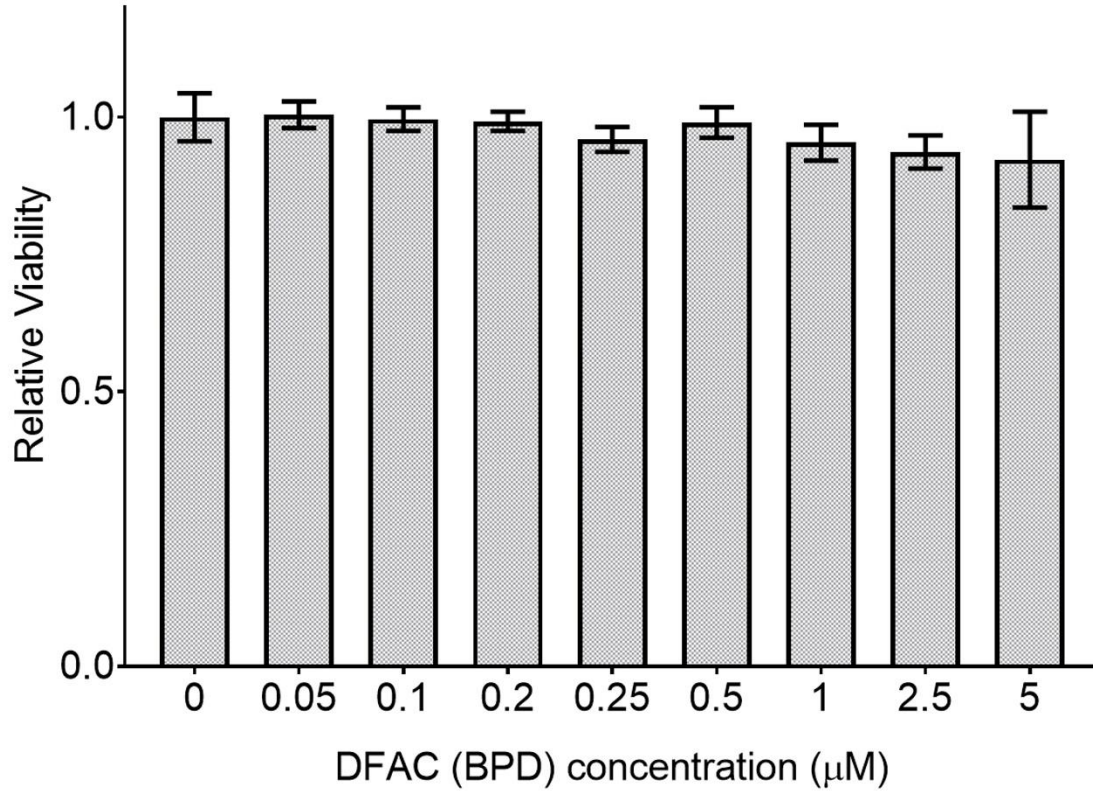

**Figure S4.** Analysis of dark toxicity of DFAC on A431 cells. A431 cells were incubated with different concentrations of DFAC (BPD equivalent) for 24 h. Cell viability was then measured by MTT assay. No significant toxicity was observed even at the highest dose of DFAC. Data are presented as mean  $\pm$  S.D ( $n \geq 4$ ).

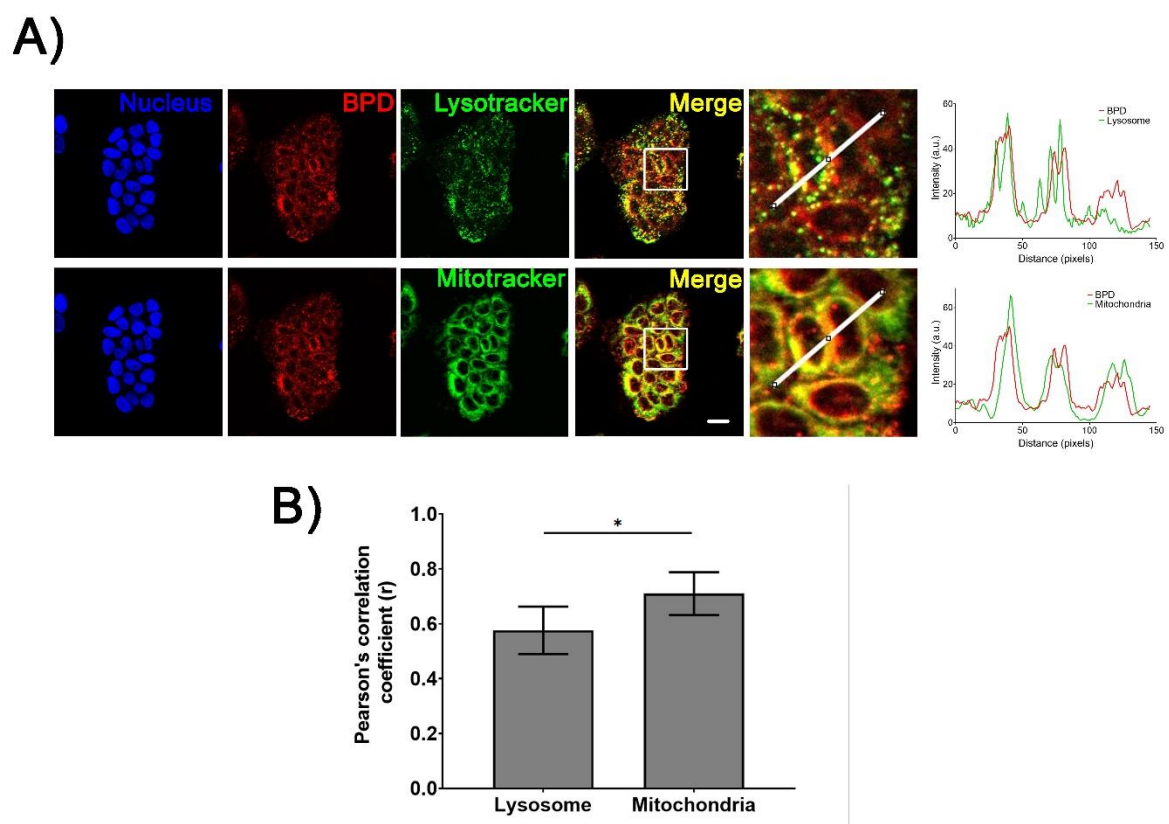

**Figure S5.** Subcellular localization of DFAC in A431 cells upon 24 h incubation. (A) Representative confocal fluorescence images of A431 cells obtained after 24 h of incubation with DFAC (1  $\mu$ M BPD equivalent). BPD signal is pseudo-colored in red. Mitochondria and Lysosomes were stained with MitoTracker™ Deep Red FM and LysoTracker™ Red DND-99

(both pseudo-colored in green), respectively. Merged images with yellow color indicate colocalization of BPD (red) with mitochondria and lysosomes (green), respectively. Nuclear staining (Hoechst; pseudo-colored in blue). Scale bar = 20  $\mu\text{m}$ . Profile plots were created using ImageJ software showing co-localization of BPD in mitochondria and Lysosomes. (B) Pearson's correlation coefficient suggests significantly higher colocalization of BPD in the mitochondria (p value 0.033) as compared to the lysosomes. Data are presented as mean  $\pm$  S.D (n = 5 different imaging fields), analyzed using Welch's t-test.

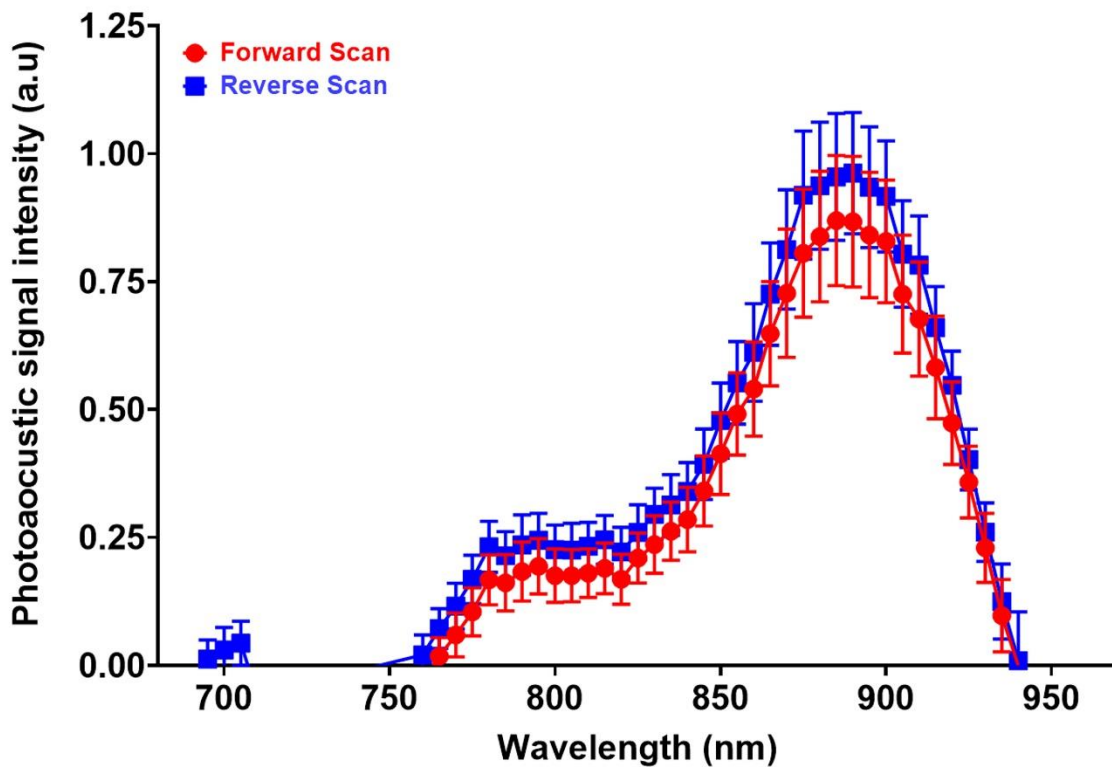

**Figure S6.** Comparison of PA spectra of DFAC performed as a forward scan (red circles) (680 to 970 nm) and reverse scan (blue squares) (970 to 680 nm). All measurements were performed in PBS at SiNc(OH) equivalent concentration of 5  $\mu$ M. Although the photoacoustic signal intensity for the forward scan was slightly lower than the reverse scan, the difference was not significant. Data are presented as mean  $\pm$  S.D ( $n \geq 4$ ).
